# Supplementary material for: Synthesis of poly(9,9-dioctylfluorene) in a rotating packed bed with enhanced performance for polymer light-emitting diodes
Source: Royal Society of Chemistry journal article supplement (doi:10.1039/d2py00297c), 2022-01-01
Supplement: d2py00297c1.pdf [file d2py00297c1.pdf]

## Electronic Supplementary Information

### Synthesis of poly(9,9-dioctylfluorene) in a rotating packed bed with enhanced performance for polymer light-emitting diode

Yuanzuo Zou,<sup>a,b</sup> Dan Wang,<sup>\*a,b</sup> Jingzhou Guo,<sup>a,b</sup> Junwei Yang,<sup>a,b</sup> Yuan Pu,<sup>a,b</sup> and Jian-Feng Chen<sup>\*a,b</sup>

<sup>a</sup> State Key Laboratory of Organic-Inorganic Composites, Beijing University of Chemical Technology, Beijing 100029, China

<sup>b</sup> Research Center of the Ministry of Education for High Gravity Engineering and Technology, Beijing University of Chemical Technology, Beijing 100029, China

\*E-mail: wangdan@mail.buct.edu.cn (D. Wang) and chenjf@mail.buct.edu.cn (J.-F. Chen)

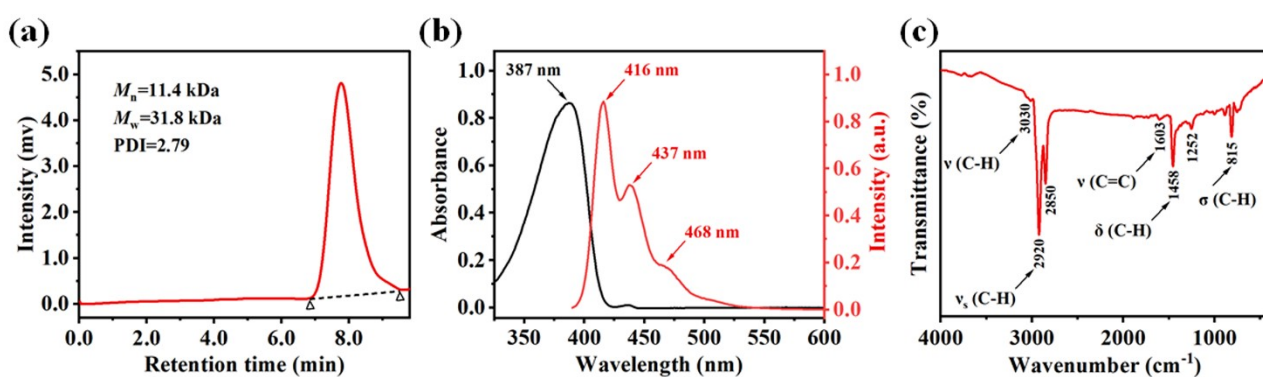

**Fig. S1.** (a) The GPC curve (in trichlorobenzene, 150 °C), (b) UV-vis and PL spectra (in toluene,  $10^{-5}$  M), and (c) FTIR spectrum of the polymer synthesized in RPB at 1:7 volume ratio of toluene to water.

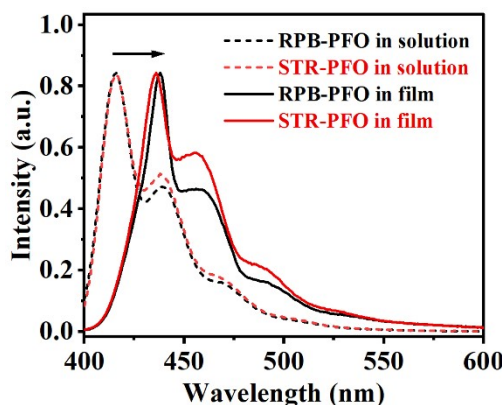

**Fig. S2.** PL spectra of STR-PFO and RPB-PFO measured in solution and film state (in toluene,  $10^{-5}$  M)
